# Supplementary material
Source: publisher site journal article supplement (https://www.dovepress.com/article/486921)
Supplement: Supplementary file 1 [file get_supplementary_file.php]

**Maternal Perspectives on and Preferences for a Postnatal Neonatal Jaundice Education Program: An Evaluation Using the Consolidated Framework for Implementation Research**

**INTERVIEW GUIDE**

1. How are you and the baby doing?
2. Tell us about your health education experience
3. How different is neonatal jaundice education from the usual maternal education you receive?
4. Do you think the NNJ education program was important? If so, how?
5. How did the NNJ education intervention influence your learning process?
6. What aspects of the education program did you prefer in comparison to the usual health education you receive?
7. Tell us how the health education approach used in this study negatively impacted you as a mother.
8. Tell us what you think about the telephone calls you received from the study team.
9. What other learning needs do you have that you would like to be resolved?
10. What else would you like us to discuss?
